# Supplementary material for: NiMoO4 Nanosheets Embedded in Microflake-Assembled CuCo2O4 Island-like Structure on Ni Foam for High-Performance Asymmetrical Solid-State Supercapacitors
Source: MDPI journal article supplement (doi:10.3390/molecules28196840), 2023-09-28
Supplement: s1 [file s1]

# NiMoO<sub>4</sub> nanosheets embedded in microflakes-assembled CuCo<sub>2</sub>O<sub>4</sub> island-like structure on Ni foam for high-performance asymmetrical solid-state supercapacitors

Gaofeng Li <sup>1\*</sup>, Lingling Chen <sup>2</sup> and Longfei Li <sup>2</sup>

<sup>1</sup> Institute of Advanced Energy Storage Technology and Equipment, Faculty of Mechanical Engineering and Mechanics, Ningbo University, Ningbo, 315211, China;

<sup>2</sup> Institute of Advanced Energy Storage Technology and Equipment, School of Materials Science and Chemical Engineering, Ningbo University, Ningbo, 315211, China; 664825847@qq.com; 2219926828@qq.com;

\* Correspondence: ligaofeng@nbu.edu.cn;

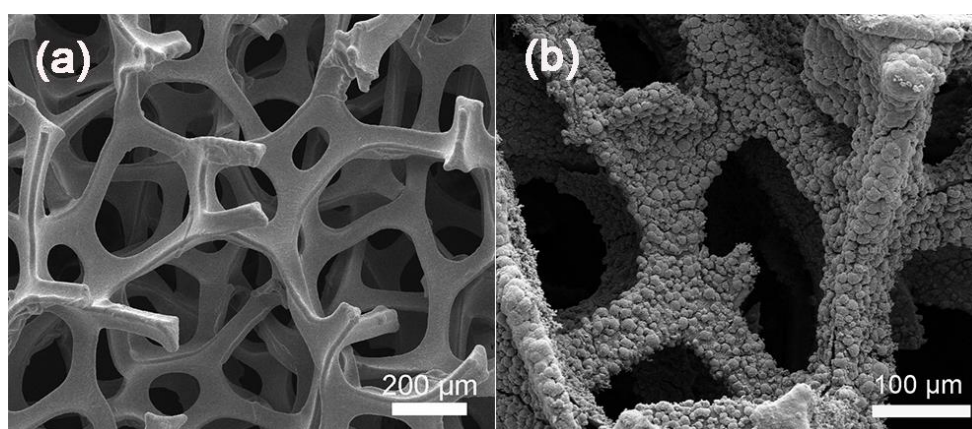

Figure S1. SEM images (a) bare Ni foam (b) Ni/CuCo<sub>2</sub>O<sub>4</sub>/NiMoO<sub>4</sub>.

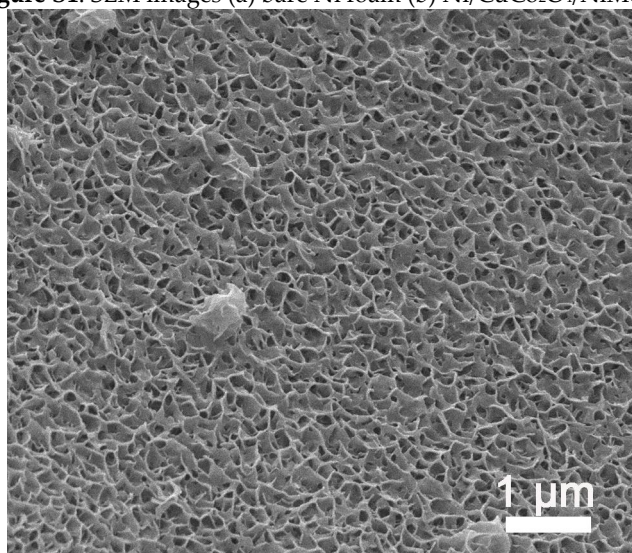

Figure S2. SEM image of NiMoO<sub>4</sub> nanosheet.

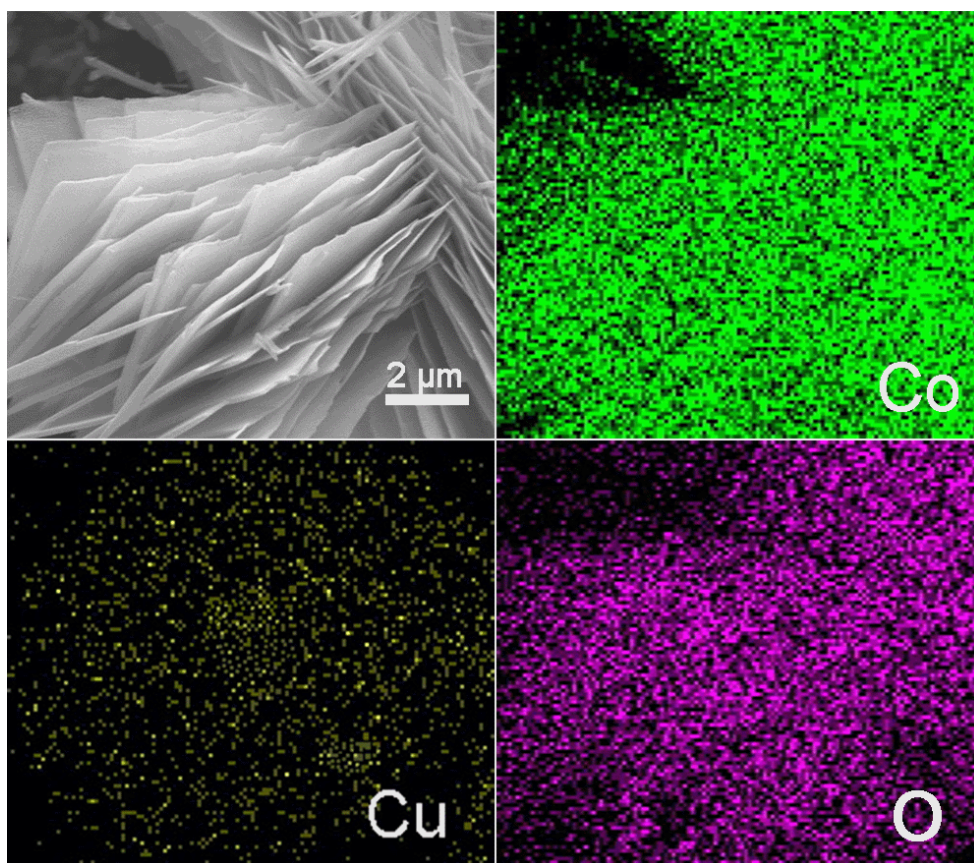

**Figure S3.** EDS mapping image of CuCo<sub>2</sub>O<sub>4</sub> microflakes.

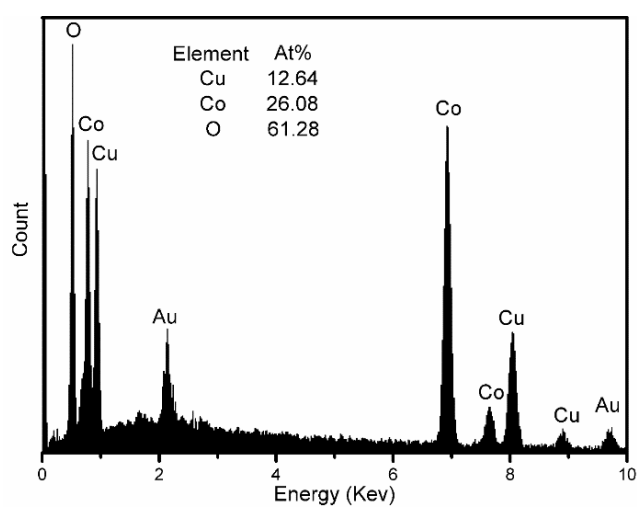

**Figure S4.** EDS spectrum of the elements Co, Cu and O.

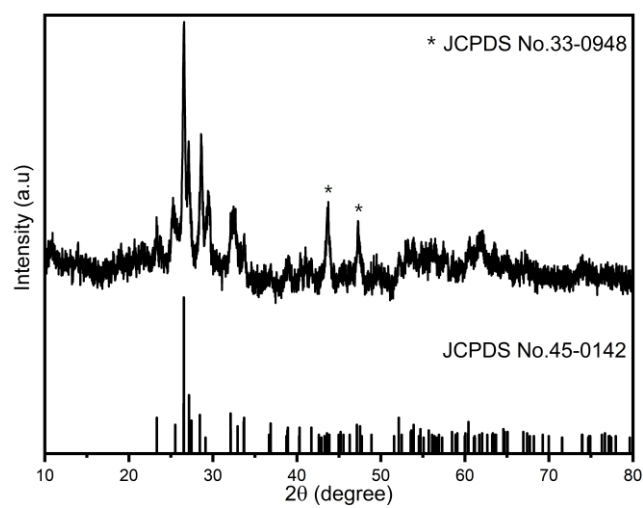

**Figure S5.** XRD pattern of  $\text{NiMoO}_4$  nanosheet.

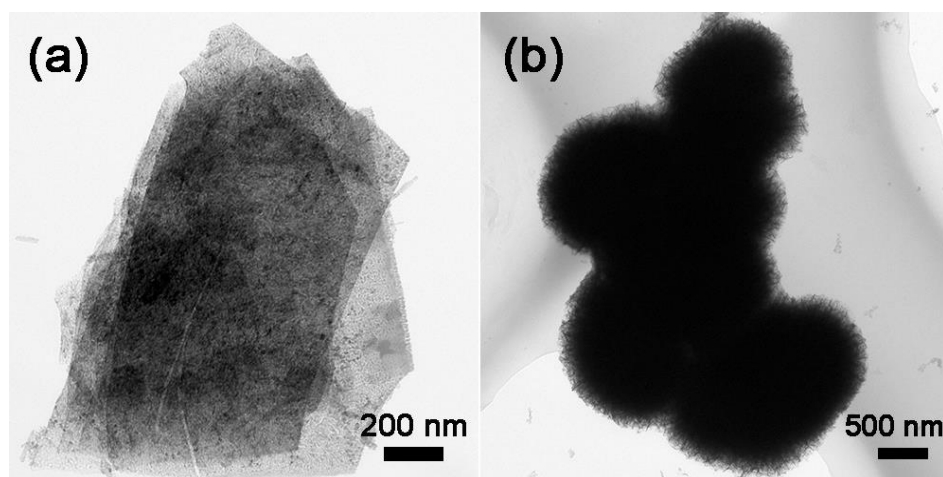

**Figure S6.** TEM images (a)  $\text{CuCo}_2\text{O}_4$  microflakes (b)  $\text{CuCo}_2\text{O}_4/\text{NiMoO}_4$  micro/nano-heterostructures.

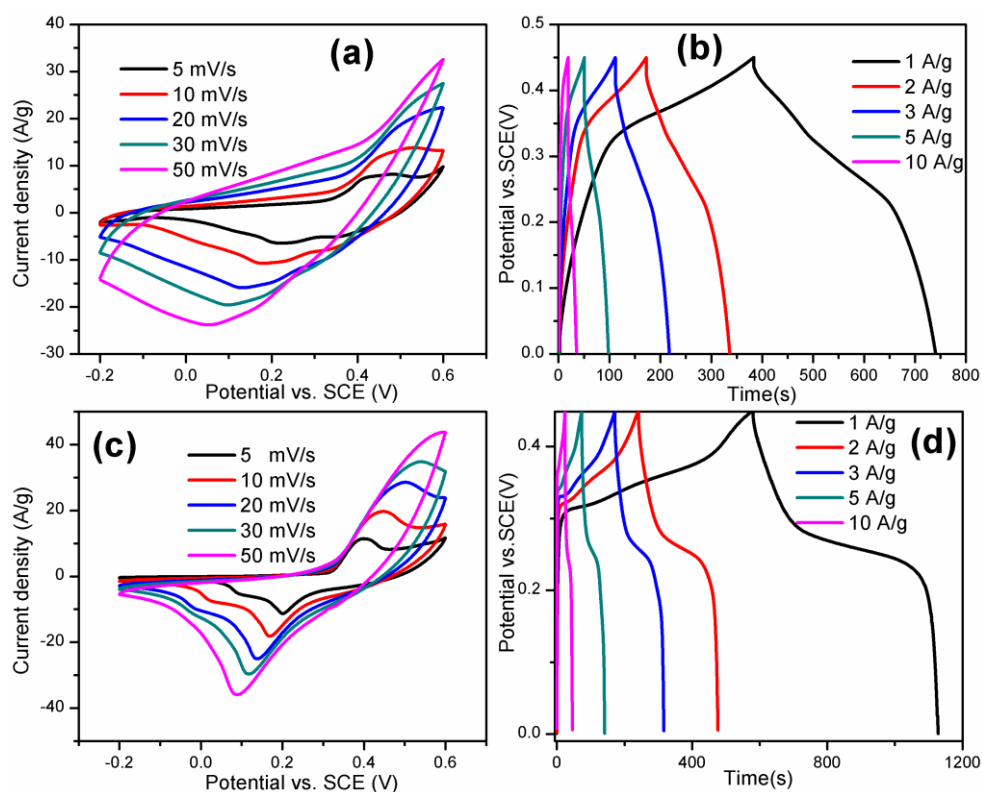

**Figure S7.** CV curves of (a)  $\text{CuCo}_2\text{O}_4$  (c)  $\text{NiMoO}_4$  at various scan rates. GCD curves of (b)  $\text{CuCo}_2\text{O}_4$  (d)  $\text{NiMoO}_4$  at different current densities.

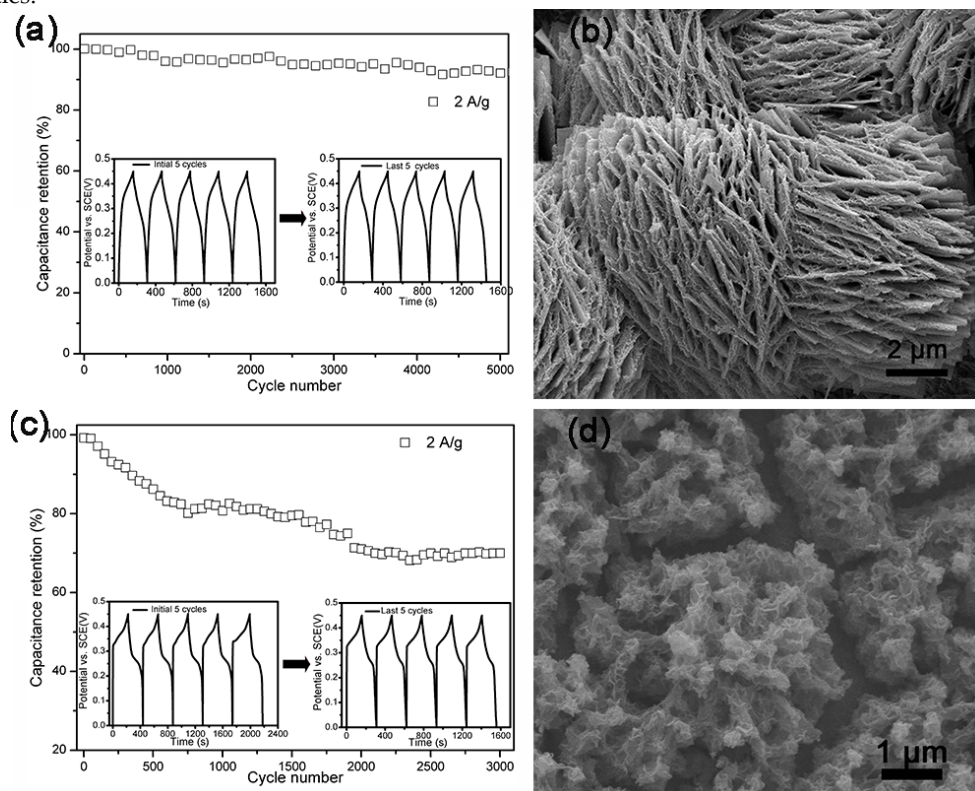

**Figure S8.** Cycling performance of (a)  $\text{CuCo}_2\text{O}_4$  electrode (c)  $\text{NiMoO}_4$  electrode at 2 A/g. (inset: GCD curves of the first 5 cycles and the last 5 cycles). SEM images of (b)  $\text{CuCo}_2\text{O}_4$  electrode after 5000 cycles (d)  $\text{NiMoO}_4$  electrode after 3000 cycles.

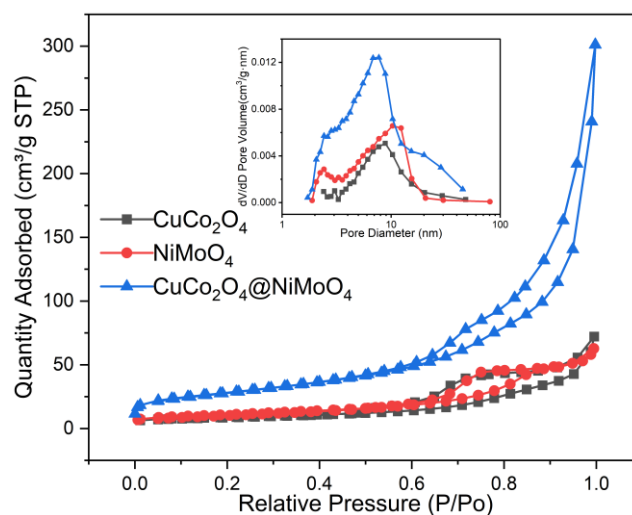

**Figure S9.** Nitrogen adsorption-desorption isotherms and pore size distribution (inset) of  $\text{CuCo}_2\text{O}_4$ ,  $\text{NiMoO}_4$  and  $\text{CuCo}_2\text{O}_4/\text{NiMoO}_4$  (powder from the Ni foam substrate).

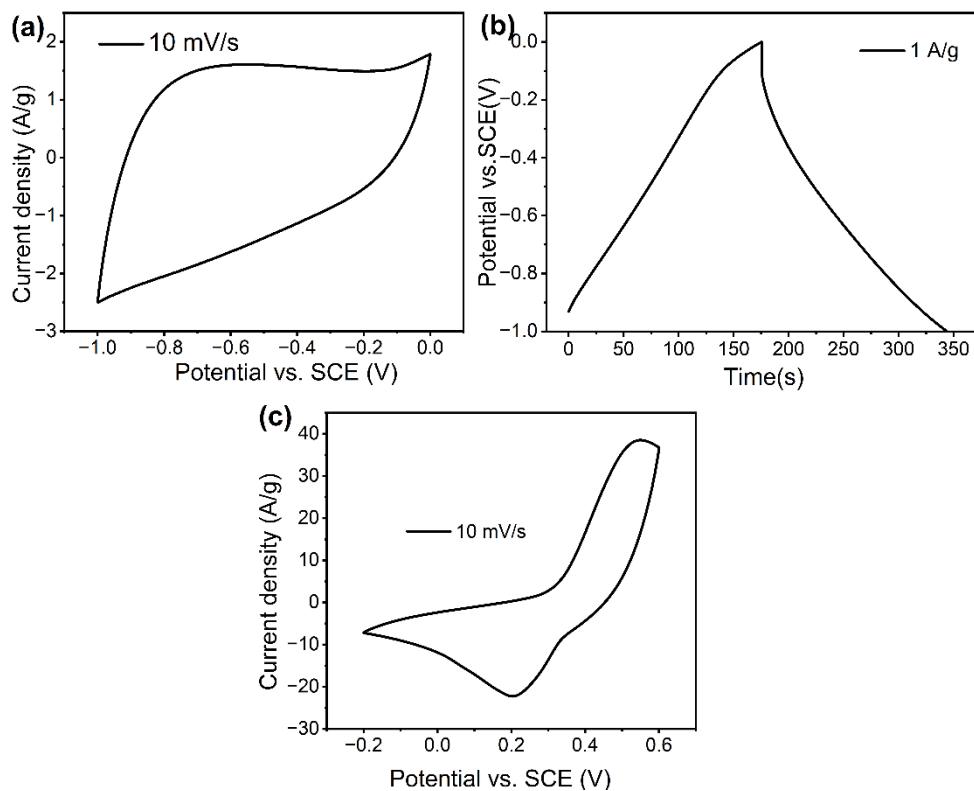

**Figure S10.** CV (a) and GCD curves (b) of AC electrode. CV curve (c) of  $\text{CuCo}_2\text{O}_4/\text{NiMoO}_4$  electrode.

**Table S1:** The fitted parameters of three electrodes.

| Sample                                                    | $R_s (\Omega)$ | $R_{ct} (\Omega)$ | $W (\Omega)$ |
|-----------------------------------------------------------|----------------|-------------------|--------------|
| $\text{CuCo}_2\text{O}_4$ microflakes                     | 1.27           | 8.27              | 9.28         |
| $\text{NiMoO}_4$ nanosheets                               | 1.36           | 0.38              | 5.53         |
| $\text{CuCo}_2\text{O}_4/\text{NiMoO}_4$ heterostructures | 0.93           | 1.14              | 7.54         |

**Table S2:** Various pseudocapacitive electrodes in supercapacitors.

| Electrode materials                                                                 | (A/g or mA cm <sup>-2</sup> ) | Capacitance F g <sup>-1</sup> (Current density) | Retention (Cycles) | Ref              |
|-------------------------------------------------------------------------------------|-------------------------------|-------------------------------------------------|--------------------|------------------|
| NiMoO <sub>4</sub> wires                                                            | 1.2 A g <sup>-1</sup>         | 1517                                            | 76.9 % (4000)      | [S1]             |
| NiMoO <sub>4</sub> /N-doping of graphene                                            | 1 A g <sup>-1</sup>           | 1913                                            | 94.2 % (5000)      | [S2]             |
| NiMoO <sub>4</sub> /rGo composites                                                  | 1 A g <sup>-1</sup>           | 1274                                            | 81.1 % (1000)      | [S3]             |
| carbon nanofibers embedded with NiMoO <sub>4</sub> nanoparticles                    | 1 A g <sup>-1</sup>           | 1438                                            | 88 %/(3000)        | [S4]             |
| CuCo <sub>2</sub> O <sub>4</sub> @MoNi-LDH                                          | 1 A g <sup>-1</sup>           | 1286                                            | 88 % (6000)        | [S5]             |
| CuCo <sub>2</sub> O <sub>4</sub> /MnCo <sub>2</sub> O <sub>4</sub> heterostructures | 0.5 A g <sup>-1</sup>         | 1434                                            | 81.4 % (5000)      | [S6]             |
| CuCo <sub>2</sub> O <sub>4</sub> @MgMoO <sub>4</sub> composites                     | 1 A g <sup>-1</sup>           | 1153                                            | 76.6 % (2000)      | [S7]             |
| NiMoO <sub>4</sub> @MoS <sub>2</sub> nanorods                                       | 1 A g <sup>-1</sup>           | 2246.7                                          | 88.4 % (5000)      | [S8]             |
| CuCo <sub>2</sub> O <sub>4</sub> /NiMoO <sub>4</sub> heterostructures               | 1 A g <sup>-1</sup>           | 2350                                            | 91.5 % (5000)      | <b>This work</b> |

## References

- Guo, D.; Luo, Y.; Yu, X.; Li, Q.; Wang, T. High performance NiMoO<sub>4</sub> nanowires supported on carbon cloth as advanced electrodes for symmetric supercapacitors. *Nano Energy* **2014**, *8*, 174-182.
- Feng, X.; Wang, J.; N. D.; Zhang, J.; Xia, M.; Wang, Y.; Hao, Y. Heterostructure arrays of NiMoO<sub>4</sub> nanoflakes on N-doping of graphene for high-performance asymmetric supercapacitors. *J. Alloys Compd.* **2020**, *816*, 152625.
- Liu, T.; Chai, H.; Jia, D.Z.; Su, Y.; Wang, T.; Zhou, W.Y. Three-dimensional Co<sub>3</sub>O<sub>4</sub>@NiMoO<sub>4</sub> core/shell nanowire arrays on Ni Foam for electrochemical energy storage. *Electrochim. Acta* **2015**, *180*, 998-1006.
- Budhiraju, V.S.; Kumar, R.; Sharma, A.; Sivakumar, S. Structurally stable hollow mesoporous graphitized carbon nanofibers embedded with NiMoO<sub>4</sub> nanoparticles for high performance asymmetric supercapacitors. *Electrochim. Acta* **2017**, *238*, 337-348.
- Zhang, C.; Sui, Q.; Lu, L.; Zou, Y.; Xu, F.; Sun, L.; Cai, D.; Xiang, C. Hollow core-shell CuCo<sub>2</sub>O<sub>4</sub>@MoNi-layered double hydroxides as an electrode material for supercapacitors. *J. Energy Storage* **2023**, *61*, 106691.
- Liu, S.; Hui, K.S.; Hui, K.N.; Yun, J.M.; Kim, K.H. Vertically stacked bilayer CuCo<sub>2</sub>O<sub>4</sub>/MnCo<sub>2</sub>O<sub>4</sub> heterostructures on functionalized graphite paper for high-performance electrochemical capacitors. *J. Mater. Chem. A* **2016**, *4*, 8061-8071.
- Hao, C.; Guo, Y.N.; Xian, S.L.; Zheng, W.H.; Gao, H.W.; Wang, X.H. Fabrication of flower-shaped CuCo<sub>2</sub>O<sub>4</sub>@MgMoO<sub>4</sub> nanocomposite for high-performance supercapacitors. *J. Energy Storage* **2021**, *41*, 102972.
- Wan, L.; Liu, J.; Li, X.; Zhang, Y.; Chen, J.; Du, C.; Xie, M. Fabrication of core-shell NiMoO<sub>4</sub>@MoS<sub>2</sub> nanorods for high-performance asymmetric hybrid supercapacitors. *Int. J. Hydrogen Energy*. **2020**, *45*, 4521-4533.
